# Supplementary material
Source: publisher figshare collection journal article supplement (https://karger.figshare.com/ndownloader/files/8716150)
Supplement: Supplementary file 1 [file 8716150]

## **Supplemental Materials**

### ***MRI acquisition***

All images were performed on a 3.0-Tesla MRI scanner (Philips 3.0T Achieva) using the following imaging parameters: sagittal slice thickness, 1.0 mm; contiguous slices with 50% overlap; no gap; repetition time (TR), 9.9 ms; echo time (TE), 4.6 ms; flip angle, 8°; and a matrix size of  $240 \times 240$  pixels reconstructed to  $480 \times 480$  over a field of view (FOV) of 240 mm.

### ***Image processing for cortical thickness***

T1-weighted MRI images were first registered to a standardized stereotaxic space using an offline transformation [1]. Images were corrected for intensity non-uniformity artifacts using the N3 algorithm [2]. Non-brain tissues of the corrected images were removed using a BET algorithm [3]. Using a neural net classifier, the brain images were then classified into white matter, gray matter, cerebrospinal fluid (CSF), and background [4]. The hemispherical surfaces of the inner and outer cortices were automatically extracted using the CLASP algorithm [5,6]. The inner and outer surfaces had the same vertex number consisting of 40,962 vertices on each hemisphere for each participant. The surfaces were transformed back into the native space using a reverse of the linear transformation, and cortical thickness was measured as the Euclidean distance between linked vertices of the inner and outer surfaces using the t-link method [7]. To compare thickness across the participants, the thicknesses were spatially normalized using surface-based registration in which the vertices of each participant were nonlinearly registered to a group template by matching sulcal folding patterns [8,9]. All procedures were automatically processed using CIVET – Montreal Neurological Institute (MNI) image processing software (<http://wiki.bic.mni.mcgill.ca/index.php/CIVET>) to produce the cortical surface and to

measure its thickness. To increase the signal-to-noise ratio and statistical power, each cortical thickness map was blurred with a surface-based diffusion smoothing kernel with a full-width half-maximum of 20 mm [10].

### ***Image processing for cerebellar volume***

We applied the same image processing for the cerebellum as described previously [11].

Briefly, cerebellar segmentation was performed using morphological operators and tissue segmentation. The processes were carried out with functions available in the CIVET pipeline software. First, the cerebellar region was roughly defined by removing the cortical tissue mask from brain images. Then we removed non-cerebellum regions that were not connected to the cerebellum using morphological operators such as erosion, dilation, and opening. A brain stem atlas was also used to separate the cerebellum and brain stem. The segmented cerebellum was masked out using a CSF classification map to exclude the false-positive results. Finally, cerebellar volume was calculated by measuring the volume of segmented cerebellum voxels in native space.

## References

- [1] Collins DL, Neelin P, Peters TM, Evans AC. Automatic 3D intersubject registration of MR volumetric data in standardized Talairach space. *J Comput Assist Tomogr* 1994;18:192-205.
- [2] Sled JG, Zijdenbos AP, Evans AC. A nonparametric method for automatic correction of intensity nonuniformity in MRI data. *IEEE Trans Med Imaging* 1998;17:87-97.
- [3] Smith SM. Fast robust automated brain extraction. *Hum Brain Mapp* 2002;17:143-55.
- [4] Zijdenbos A, Evans A, Riahi F, Sled J, Chui J, Kollokian V. Automatic quantification of multiple sclerosis lesion volume using stereotaxic space. *Visualization in Biomedical Computing* 1996;1131:439-48.
- [5] Kim JS, Singh V, Lee JK, Lerch J, Ad-Dab'bagh Y, MacDonald D, Lee JM, Kim SI, Evans AC. Automated 3-D extraction and evaluation of the inner and outer cortical surfaces using a Laplacian map and partial volume effect classification. *Neuroimage* 2005;27:210-21.
- [6] MacDonald D, Kabani N, Avis D, Evans AC. Automated 3-D extraction of inner and outer surfaces of cerebral cortex from MRI. *Neuroimage* 2000;12:340-56.
- [7] Lerch JP, Evans AC. Cortical thickness analysis examined through power analysis and a population simulation. *Neuroimage* 2005;24:163-73.
- [8] Lyttelton O, Boucher M, Robbins S, Evans A. An unbiased iterative group registration template for cortical surface analysis. *Neuroimage* 2007;34:1535-44.
- [9] Robbins S, Evans AC, Collins DL, Whitesides S. Tuning and comparing spatial normalization methods. *Medical Image Analysis* 2004;8:311-23.
- [10] Chung MK, Worsley KJ, Paus T, Cherif C, Collins DL, Giedd JN, Rapoport JL, Evans AC. A unified statistical approach to deformation-based morphometry. *Neuroimage* 2001;14:595-606.

- [11] Kim JS, Youn J, Yang JJ, Lee DK, Lee JM, Kim ST, Kim HT, Cho JW. Topographic distribution of cortical thinning in subtypes of multiple system atrophy. *Parkinsonism Relat Disord* 2013;19:970-4.
